# Supplementary material for: Neuraminidase Antibody Response to Homologous and Drift Influenza a Viruses After Immunization with Seasonal Influenza Vaccines
Source: Preprints.org preprint supplement (doi:10.20944/preprints202410.2308.v1), 2024-10-30
Supplement: Supplementary file 1 [file supplementary]

Table S1. Seroprotection levels to HA and NA of influenza viruses A/H1N1pdm09 and A/H3N2 before and after vaccination with seasonal IIVs in patients of different age groups (%).

| Assay | Age | A/H1N1pdm09 | | | | A/H3N2 | | | |
| --- | --- | --- | --- | --- | --- | --- | --- | --- | --- |
| S1 | S2 | S1 | S2 | S1 | S2 | S1 | S2 |
| Michigan/15 | | Gd-Maonan/19 | | Singapore/16 | | Brisbane/18 | |
| HI | ≥60 | 50.0 | 80.0 | 20.0 | 33.3 | 46.7 | 80.0 | 3.3 | 23.3 |
| <60 | 73.5 | 82.4 | 11.8 | 23.5 | 44.1 | 82.4 | 2.9 | 11.8 |
|  |  | H6N1/13 | | H6N1/19 | | H6N2/14 | | H6N2/18 | |
| NI | ≥60 | 40.0 | 46.7 | 6.7 | 23.3* | 33.3 | 63.3 | 3.3 | 3.3 |
| <60 | 38.2 | 52.9 | 0.0 | 5.9* | 41.2 | 61.8 | 0.0 | 2.9 |

* - P<0.05, Fisher's exact test.
